# Supplementary material for: Factors associated with disease flare following SARS-CoV-2 vaccination in people with inflammatory rheumatic and musculoskeletal diseases: results from the physician-reported EULAR Coronavirus Vaccine (COVAX) Registry
Source: PubMed Central journal article supplement — Ann Rheum Dis. 2024 May 30;83(11):e225869. doi: 10.1136/ard-2024-225869 (PMC11503143; doi:10.1136/ard-2024-225869), 2024-05-30
Supplement: ard-83-11-s001.pdf [file ard-83-11-s001.pdf]

| <b>Supplementary table 1. Demographic and clinical characteristics of patients according to flare occurrence</b> |                                                                   |                                        |                                            |                                  |
|------------------------------------------------------------------------------------------------------------------|-------------------------------------------------------------------|----------------------------------------|--------------------------------------------|----------------------------------|
|                                                                                                                  |                                                                   | <b>Patients with flare<br/>(n=272)</b> | <b>Patients without flare<br/>(n=7064)</b> | <b>All patients<br/>(n=7336)</b> |
| <b>Age, years</b>                                                                                                | Mean (SD)                                                         | 56.2 (14.3)                            | 58.4 (15.5)                                | 58.3 (15.5)                      |
|                                                                                                                  | Range                                                             | 19 to 88                               | 18 to 96                                   | 18 to 96                         |
| <b>Sex</b>                                                                                                       | Female                                                            | 204 (75)                               | 4779 (67.7)                                | 4983 (67.9)                      |
|                                                                                                                  | Male                                                              | 68 (25)                                | 2285 (32.3)                                | 2353 (32.1)                      |
| <b>Primary I-RMD diagnosis</b>                                                                                   | Rheumatoid arthritis                                              | 112 (41.2)                             | 2535 (35.9)                                | 2647 (36.1)                      |
|                                                                                                                  | Axial spondyloarthritis                                           | 37 (13.6)                              | 1147 (16.2)                                | 1184 (16.1)                      |
|                                                                                                                  | Psoriatic arthritis                                               | 33 (12.1)                              | 859 (12.2)                                 | 892 (12.2)                       |
|                                                                                                                  | Other peripheral spondyloarthritis (including reactive arthritis) | 14 (5.1)                               | 164 (2.3)                                  | 178 (2.4)                        |
|                                                                                                                  | Non-systemic juvenile idiopathic arthritis                        | 3 (1.1)                                | 85 (1.2)                                   | 88 (1.2)                         |
|                                                                                                                  | Systemic juvenile idiopathic arthritis                            | 0                                      | 14 (<1)                                    | 14 (<1)                          |
|                                                                                                                  | Gout or other crystal arthritis                                   | 2 (<1)                                 | 98 (1.4)                                   | 100 (1.4)                        |
|                                                                                                                  | Other inflammatory arthritis                                      | 5 (1.8)                                | 99 (1.4)                                   | 104 (1.4)                        |
|                                                                                                                  | Systemic lupus erythematosus                                      | 16 (5.9)                               | 530 (7.5)                                  | 546 (7.4)                        |
|                                                                                                                  | Primary anti-phospholipid syndrome                                | 3 (1.1)                                | 30 (<1)                                    | 33 (<1)                          |
|                                                                                                                  | Sjogren's syndrome                                                | 12 (4.4)                               | 282 (4)                                    | 294 (4)                          |
|                                                                                                                  | Systemic sclerosis                                                | 3 (1.1)                                | 242 (3.4)                                  | 245 (3.3)                        |
|                                                                                                                  | Idiopathic inflammatory myopathy                                  | 0                                      | 86 (1.2)                                   | 86 (1.2)                         |
|                                                                                                                  | Mixed connective tissue disease                                   | 2 (<1)                                 | 42 (<1)                                    | 44 (<1)                          |
|                                                                                                                  | Undifferentiated connective tissue disease                        | 2 (<1)                                 | 70 (1)                                     | 72 (1)                           |
|                                                                                                                  | Large vessel vasculitis - Takayasu arteritis                      | 0                                      | 18 (<1)                                    | 18 (<1)                          |
|                                                                                                                  | Large vessel vasculitis - giant cell arteritis                    | 3 (1.1)                                | 154 (2.2)                                  | 157 (2.1)                        |
|                                                                                                                  | Polymyalgia rheumatica                                            | 8 (2.9)                                | 262 (3.7)                                  | 270 (3.7)                        |
|                                                                                                                  | Medium-vessel vasculitis - polyarteritis nodosa, Kawasaki disease | 4 (1.5)                                | 10 (<1)                                    | 14 (<1)                          |
|                                                                                                                  | ANCA-associated vasculitis - MPA, GPA, EGPA                       | 5 (1.8)                                | 134 (1.9)                                  | 139 (1.9)                        |
|                                                                                                                  | Immune complex small vessel vasculitis                            | 0                                      | 9 (<1)                                     | 9 (<1)                           |
|                                                                                                                  | Bechet's disease                                                  | 1 (<1)                                 | 49 (<1)                                    | 50 (<1)                          |
|                                                                                                                  | Other vasculitis                                                  | 1 (<1)                                 | 28 (<1)                                    | 29 (<1)                          |
|                                                                                                                  | Monogenic autoinflammatory syndrome                               | 1 (<1)                                 | 17 (<1)                                    | 17 (<1)                          |
| Non-monogenic autoinflammatory syndrome                                                                          | 1 (<1)                                                            | 14 (<1)                                | 15 (<1)                                    |                                  |
| IgG4-related disease                                                                                             | 0                                                                 | 16 (<1)                                | 16 (<1)                                    |                                  |

|                                            |                                            |            |             |             |
|--------------------------------------------|--------------------------------------------|------------|-------------|-------------|
|                                            | Sarcoidosis                                | 2 (<1)     | 61 (<1)     | 63 (<1)     |
|                                            | Relapsing polychondritis                   | 2 (<1)     | 7 (<1)      | 9 (<1)      |
|                                            | Chronic recurrent multifocal osteomyelitis | 0          | 3 (<1)      | 3 (<1)      |
| <b>Physician-reported disease activity</b> | Remission                                  | 98 (36)    | 2817 (39.9) | 2915 (39.7) |
|                                            | Low disease activity                       | 103 (37.9) | 1908 (27)   | 2011 (27.4) |
|                                            | Moderate disease activity                  | 51 (18.8)  | 887         | 938 (12.8)  |
|                                            | High disease activity                      | 4 (1.5)    | 164         | 168 (2.3)   |
|                                            | Missing/unknown                            | 16 (5.9)   | 1288        | 1304 (17.8) |
| <b>Anti-rheumatic medication exposure</b>  |                                            |            |             |             |
| <b>csDMARDs</b>                            |                                            | 138 (50.7) | 4131(58.5)  | 4269 (58.2) |
|                                            | Antimalarials                              | 29 (10.7)  | 945 (13.4)  | 974 (13.3)  |
|                                            | Leflunomide                                | 15 (5.5)   | 388 (5.5)   | 403 (5.5)   |
|                                            | Methotrexate                               | 82 (30.1)  | 2420 (34.3) | 2502 (34.1) |
|                                            | Sulfasalazine                              | 12 (4.4)   | 378 (5.4)   | 390 (5.3)   |
| <b>bDMARDs</b>                             |                                            | 122 (44.9) | 3227 (45.7) | 3349 (45.7) |
|                                            | Abatacept                                  | 7 (2.6)    | 114 (1.6)   | 121 (1.6)   |
|                                            | Belimumab                                  | 0          | 38 (<1)     | 38 (<1)     |
|                                            | Rituximab                                  | 6 (2.2)    | 315 (4.5)   | 321 (4.4)   |
|                                            | IL-1 inhibitors                            | 2 (<1)     | 27 (<1)     | 29 (<1)     |
|                                            | IL-6 inhibitors                            | 11 (4)     | 342 (4.8)   | 353 (4.8)   |
|                                            | IL-12/23 inhibitors                        | 3 (1.1)    | 46 (<1)     | 49 (<1)     |
|                                            | IL-23 inhibitors                           | 1 (<1)     | 5 (<1)      | 6 (<1)      |
|                                            | IL-17 inhibitors                           | 9 (3.3)    | 200 (2.8)   | 209 (2.8)   |
|                                            | TNF-inhibitors                             | 83 (30.5)  | 2140 (30.3) | 2223 (30.3) |
| <b>tsDMARDs</b>                            |                                            | 12 (4.4)   | 237 (3.4)   | 249 (3.4)   |
|                                            | Apremilast                                 | 0          | 13 (<1)     | 13 (<1)     |
|                                            | JAK inhibitors                             | 12 (4.4)   | 224 (3.2)   | 236 (3.2)   |
| <b>Immunosuppressants</b>                  |                                            | 80 (29.4)  | 2501 (35.4) | 2581 (35.2) |
|                                            | Glucocorticoids (systemic)                 | 67 (24.6)  | 2154 (30.5) | 2221 (30.3) |
|                                            | Azathioprine/6-mercaptopurine              | 5 (1.8)    | 144 (2)     | 149 (2)     |
|                                            | Cyclosporine                               | 0          | 29 (<1)     | 29 (<1)     |
|                                            | Cyclophosphamide                           | 0          | 13 (<1)     | 13 (<1)     |
|                                            | Mycophenolate mofetil/mycophenolic acid    | 8 (2.9)    | 153 (2.2)   | 161 (2.2)   |
|                                            | Tacrolimus                                 | 0          | 8 (<1)      | 8 (<1)      |
| <b>Other medications</b>                   |                                            |            |             |             |

|                |                            |           |           |          |
|----------------|----------------------------|-----------|-----------|----------|
|                | Intravenous immunoglobulin | 0         | 16 (<1)   | 16 (<1)  |
|                | Antifibrotics              | 1 (<1)    | 9 (<1)    | 10 (<1)  |
| <b>None</b>    |                            | 33 (12.1) | 483 (6.8) | 516 (7)  |
| <b>Unknown</b> |                            | 0         | 87 (1.2)  | 87 (1.2) |

All medications including monotherapy and/or combination therapy. ANCA: anti-neutrophil cytoplasmic antibody; bDMARDs: biologic disease-modifying anti-rheumatic drugs; csDMARDs: conventional synthetic disease-modifying anti-rheumatic drugs; IgG4: Immunoglobulin G4; EGPA: eosinophilic granulomatosis with polyangiitis; GPA: granulomatosis with polyangiitis; IL: interleukin; I-RMD: inflammatory/autoimmune rheumatic and musculoskeletal disease; JAK: janus kinase; MPA: microscopic polyangiitis; tsDMARDs: targeted synthetic disease-modifying anti-rheumatic drugs; TNF: tumor necrosis factor.

| <b>Supplementary table 2. Anti-rheumatic medication exposure in patients with post-vaccination flare</b> |                    |                   |                          |                    |                             |
|----------------------------------------------------------------------------------------------------------|--------------------|-------------------|--------------------------|--------------------|-----------------------------|
|                                                                                                          | <b>IJD, n= 206</b> | <b>CTD, n= 38</b> | <b>Vasculitis, n= 22</b> | <b>OIRMD, n= 6</b> | <b>All patients, n= 272</b> |
| <b>csDMARDs</b>                                                                                          | 105 (51)           | 26 (68.4)         | 5 (22.7)                 | 2 (33.3)           | 138 (50.7)                  |
| <b>Antimalarials</b>                                                                                     | 9 (4.4)            | 19 (50)           | 0                        | 1 (16.7)           | 29 (10.7)                   |
| Held before vaccination                                                                                  | 0                  | 0                 | 0                        | 0                  | 0                           |
| Reduced before vaccination                                                                               | 0                  | 0                 | 0                        | 0                  | 0                           |
| Held after vaccination                                                                                   | 0                  | 0                 | 0                        | 0                  | 0                           |
| Reduced after vaccination                                                                                | 0                  | 0                 | 0                        | 0                  | 0                           |
| <b>Leflunomide</b>                                                                                       | 14 (6.8)           | 1 (2.6)           | 0                        | 0                  | 15 (5.5)                    |
| Held before vaccination                                                                                  | 2                  | 0                 | 0                        | 0                  | 2                           |
| Reduced before vaccination                                                                               | 0                  | 0                 | 0                        | 0                  | 0                           |
| Held after vaccination                                                                                   | 1                  | 0                 | 0                        | 0                  | 1                           |
| Reduced after vaccination                                                                                | 0                  | 0                 | 0                        | 0                  | 0                           |
| <b>Methotrexate</b>                                                                                      | 70 (34)            | 6 (15.8)          | 5 (22.7)                 | 1 (16.7)           | 82 (30.1)                   |
| Held before vaccination                                                                                  | 5                  | 1                 | 2                        | 0                  | 8                           |
| Reduced before vaccination                                                                               | 0                  | 0                 | 0                        | 0                  | 0                           |
| Held after vaccination                                                                                   | 17                 | 0                 | 0                        | 0                  | 17                          |
| Reduced after vaccination                                                                                | 0                  | 0                 | 0                        | 0                  | 0                           |
| <b>Sulfasalazine</b>                                                                                     | 12 (5.8)           | 0                 | 0                        | 0                  | 12 (4.4)                    |
| Held before vaccination                                                                                  | 0                  | 0                 | 0                        | 0                  | 0                           |
| Reduced before vaccination                                                                               | 0                  | 0                 | 0                        | 0                  | 0                           |
| Held after vaccination                                                                                   | 0                  | 0                 | 0                        | 0                  | 0                           |
| Reduced after vaccination                                                                                | 0                  | 0                 | 0                        | 0                  | 0                           |
| <b>bDMARDs</b>                                                                                           | 110 (53.4)         | 4 (10.5)          | 7 (31.8)                 | 1 (16.7)           | 122 (44.9)                  |
| <b>Abatacept</b>                                                                                         | 7 (3.4)            | 0                 | 0                        | 0                  | 7 (2.6)                     |
| Held before vaccination                                                                                  | 2                  | 0                 | 0                        | 0                  | 2                           |
| Reduced before vaccination                                                                               | 0                  | 0                 | 0                        | 0                  | 0                           |
| Held after vaccination                                                                                   | 0                  | 0                 | 0                        | 0                  | 0                           |
| Reduced after vaccination                                                                                | 0                  | 0                 | 0                        | 0                  | 0                           |
| <b>Belimumab</b>                                                                                         | 0                  | 0                 | 0                        | 0                  | 0                           |
| <b>Rituximab</b>                                                                                         | 4 (1.9)            | 0                 | 2 (9.1)                  | 0                  | 6 (2.2)                     |
| Held before vaccination                                                                                  | 0                  | 0                 | 0                        | 0                  | 0                           |
| Reduced before vaccination                                                                               | 0                  | 0                 | 0                        | 0                  | 0                           |

|                            |           |         |          |          |           |
|----------------------------|-----------|---------|----------|----------|-----------|
| Held after vaccination     | 0         | 0       | 0        | 0        | 0         |
| Reduced after vaccination  | 1         | 0       | 0        | 0        | 1         |
| <b>IL-1 inhibitors</b>     | 0         | 1 (2.6) | 0        | 1 (16.7) | 2 (<1)    |
| Held before vaccination    | 0         | 0       | 0        | 0        | 0         |
| Reduced before vaccination | 0         | 0       | 0        | 0        | 0         |
| Held after vaccination     | 0         | 0       | 0        | 0        | 0         |
| Reduced after vaccination  | 0         | 0       | 0        | 0        | 0         |
| <b>IL-6 inhibitors</b>     | 7 (3.4)   | 1 (2.6) | 3 (13.6) | 0        | 11 (4)    |
| Held before vaccination    | 0         | 0       | 1        | 0        | 1         |
| Reduced before vaccination | 0         | 0       | 0        | 0        | 0         |
| Held after vaccination     | 0         | 0       | 0        | 0        | 0         |
| Reduced after vaccination  | 0         | 0       | 0        | 0        | 0         |
| <b>IL-12/23 inhibitors</b> | 2 (1)     | 1 (2.6) | 0        | 0        | 3 (1.1)   |
| Held before vaccination    | 0         | 0       | 0        | 0        | 0         |
| Reduced before vaccination | 0         | 0       | 0        | 0        | 0         |
| Held after vaccination     | 0         | 0       | 0        | 0        | 0         |
| Reduced after vaccination  | 0         | 0       | 0        | 0        | 0         |
| <b>IL-23 inhibitors</b>    | 1 (<1)    | 0       | 0        | 0        | 1 (<1)    |
| Held before vaccination    | 0         | 0       | 0        | 0        | 0         |
| Reduced before vaccination | 0         | 0       | 0        | 0        | 0         |
| Held after vaccination     | 0         | 0       | 0        | 0        | 0         |
| Reduced after vaccination  | 0         | 0       | 0        | 0        | 0         |
| <b>IL-17 inhibitors</b>    | 9 (4.4)   | 0       | 0        | 0        | 9 (3.3)   |
| Held before vaccination    | 0         | 0       | 0        | 0        | 0         |
| Reduced before vaccination | 0         | 0       | 0        | 0        | 0         |
| Held after vaccination     | 1         | 0       | 0        | 0        | 1         |
| Reduced after vaccination  | 1         | 0       | 0        | 0        | 1         |
| <b>TNF-inhibitors</b>      | 80 (38.8) | 1 (2.6) | 2 (9.1)  | 0        | 83 (30.5) |
| Held before vaccination    | 10        | 0       | 1        | 0        | 11        |
| Reduced before vaccination | 2         | 0       | 0        | 0        | 2         |
| Held after vaccination     | 9         | 1       | 0        | 0        | 10        |
| Reduced after vaccination  | 4         | 0       | 0        | 0        | 4         |
| <b>tsDMARDS</b>            | 12 (5.8)  | 0       | 0        | 0        | 12 (4.4)  |
| <b>Apremilast</b>          | 0         | 0       | 0        | 0        | 0         |
| <b>JAK inhibitors</b>      | 12 (5.8)  | 0       | 0        | 0        | 12 (4.4)  |

|                                                |           |           |           |          |           |
|------------------------------------------------|-----------|-----------|-----------|----------|-----------|
| Held before vaccination                        | 1         | 0         | 0         | 0        | 1         |
| Reduced before vaccination                     | 0         | 0         | 0         | 0        | 0         |
| Held after vaccination                         | 2         | 0         | 0         | 0        | 2         |
| Reduced after vaccination                      | 0         | 0         | 0         | 0        | 0         |
| <b>Immunosuppressants</b>                      |           |           |           |          |           |
| <b>Glucocorticoids (systemic)</b>              | 27 (13.1) | 21 (55.3) | 14 (63.6) | 5 (83.3) | 67 (24.6) |
| Held before vaccination                        | 0         | 0         | 0         | 0        | 0         |
| Reduced before vaccination                     | 0         | 1         | 0         | 0        | 1         |
| Held after vaccination                         | 0         | 0         | 0         | 0        | 0         |
| Reduced after vaccination                      | 1         | 0         | 0         | 0        | 1         |
| <b>Azathioprine/6-mercaptopurine</b>           | 0         | 3 (7.9)   | 0         | 2 (33.3) | 5 (1.8)   |
| Held before vaccination                        | 0         | 0         | 0         | 0        | 0         |
| Reduced before vaccination                     | 0         | 0         | 0         | 0        | 0         |
| Held after vaccination                         | 0         | 0         | 0         | 0        | 0         |
| Reduced after vaccination                      | 0         | 0         | 0         | 0        | 0         |
| <b>Cyclosporine</b>                            | 0         | 0         | 0         | 0        | 0         |
| <b>Cyclophosphamide</b>                        | 0         | 0         | 0         | 0        | 0         |
| <b>Mycophenolate mofetil/mycophenolic acid</b> | 0         | 7 (18.4)  | 1 (4.5)   | 0        | 8 (2.9)   |
| Held before vaccination                        | 0         | 1         | 0         | 0        | 1         |
| Reduced before vaccination                     | 0         | 0         | 0         | 0        | 0         |
| Held after vaccination                         | 0         | 0         | 0         | 0        | 0         |
| Reduced after vaccination                      | 0         | 0         | 0         | 0        | 0         |
| <b>Tacrolimus</b>                              | 0         | 0         | 0         | 0        | 0         |
| <b>Other</b>                                   |           |           |           |          |           |
| <b>Intravenous immunoglobulin</b>              | 0         | 0         | 0         | 0        | 0         |
| <b>Antifibrotics</b>                           | 0         | 1 (2.6)   | 0         | 0        | 1 (<1)    |
| Held before vaccination                        | 0         | 0         | 0         | 0        | 0         |
| Reduced before vaccination                     | 0         | 0         | 0         | 0        | 0         |
| Held after vaccination                         | 0         | 0         | 0         | 0        | 0         |
| Reduced after vaccination                      | 0         | 0         | 0         | 0        | 0         |
| <b>None</b>                                    | 22 (10.7) | 5 (13.2)  | 6 (27.3)  | 0        | 33 (12.1) |
| <b>Unknown</b>                                 | 0         | 0         | 0         | 0        | 0         |

\* Including monotherapy and/or combination therapy. bDMARDs: biologic disease-modifying anti-rheumatic drugs; csDMARDs: conventional synthetic disease-modifying anti-rheumatic drugs; IL: interleukin; JAK: janus kinase; tsDMARDs: targeted synthetic disease-modifying anti-rheumatic drugs; RMD: rheumatic and musculoskeletal disease; TNF: tumor necrosis factor.

**Supplementary table 3.** Univariable logistic regression analyses of factors associated with flare, using either “I-RMD flare” or “new anti-rheumatic medication or dosage increase due to flare” as the dependent variable

| Covariates                                                                          | Outcome: flare   |                  | Outcome: new medication or dosage increase due to flare |                  |
|-------------------------------------------------------------------------------------|------------------|------------------|---------------------------------------------------------|------------------|
|                                                                                     | OR (95% CI)      | p-value          | OR (95% CI)                                             | p-value          |
| <b>Age, per decade of life</b>                                                      | 0.91 (0.84-0.98) | <b>0.024</b>     | 0.99 (0.98-1.004)                                       | 0.19             |
| <b>Female sex</b>                                                                   | 1.43 (1.08-1.89) | <b>0.011</b>     | 1.24 (0.82-1.88)                                        | 0.32             |
| <b>Diagnostic group</b>                                                             |                  |                  |                                                         |                  |
| Inflammatory joint diseases                                                         | Reference        |                  | Reference                                               |                  |
| Connective tissue diseases                                                          | 0.72 (0.51-1.02) | 0.066            | 0.85 (0.46-1.59)                                        | 0.61             |
| Vasculitis                                                                          | 0.80 (0.51-1.25) | 0.34             | 0.94 (0.47-1.86)                                        | 0.85             |
| Other I-RMD                                                                         | 1.24 (0.54-2.86) | 0.61             | 1.09 (0.32-3.70)                                        | 0.89             |
| <b>Disease activity</b>                                                             |                  |                  |                                                         |                  |
| Remission                                                                           | Reference        |                  | Reference                                               |                  |
| Low disease activity                                                                | 1.56 (1.18-2.08) | <b>0.002</b>     | 1.46 (0.94-2.25)                                        | 0.093            |
| Moderate/high disease activity                                                      | 1.35 (0.97-1.90) | 0.076            | 3.08 (1.91-4.97)                                        | <b>&lt;0.001</b> |
| <b>Vaccine</b>                                                                      |                  |                  |                                                         |                  |
| Pfizer                                                                              | Reference        |                  | Reference                                               |                  |
| Moderna                                                                             | 0.90 (0.58-1.39) | 0.65             | 1.38 (0.77-2.48)                                        | 0.28             |
| AstraZeneca                                                                         | 1.19 (0.87-1.62) | 0.27             | 1.42 (0.90-2.22)                                        | 0.13             |
| Other                                                                               | 0.09 (0.01-0.68) | <b>0.02</b>      | 0                                                       | 1                |
| <b>Anti-rheumatic medication</b>                                                    |                  |                  |                                                         |                  |
| None                                                                                | Reference        |                  | Reference                                               |                  |
| Immunosuppressants                                                                  | 0.39 (0.09-1.64) | 0.20             | 0                                                       | 1                |
| Methotrexate                                                                        | 0.87 (0.59-1.30) | 0.52             | 0.48 (0.26-0.89)                                        | <b>0.019</b>     |
| Leflunomide                                                                         | 1.49 (0.74-2.97) | 0.26             | 0.77 (0.26-2.29)                                        | 0.64             |
| Sulfasalazine                                                                       | 1.19 (0.50-2.83) | 0.68             | 0.75 (0.22-2.63)                                        | 0.66             |
| Antimalarials                                                                       | 0.75 (0.43-1.29) | 0.30             | 0.47 (0.19-1.17)                                        | 0.10             |
| TNFi                                                                                | 0.93 (0.66-1.32) | 0.71             | 0.60 (0.33-1.09)                                        | 0.095            |
| tsDMARDs                                                                            | 1.22 (0.64-2.31) | 0.54             | 0.39 (0.13-1.18)                                        | 0.095            |
| Rituximab                                                                           | 0.46 (0.19-1.07) | 0.074            | 0.10 (0.01-0.77)                                        | <b>0.027</b>     |
| Other bDMARDs                                                                       | 1.03 (0.66-1.60) | 0.88             | 0.57 (0.28-1.14)                                        | 0.11             |
| <b>Glucocorticoids</b>                                                              | 0.77 (0.55-1.09) | 0.14             | 0.96 (0.56-1.64)                                        | 0.87             |
| <b>Cessation/reduction of anti-rheumatic medications at the time of vaccination</b> | 4.60 (3.40-6.23) | <b>&lt;0.001</b> | 2.25 (1.33-3.79)                                        | <b>0.002</b>     |

For “Outcome: flare”, the total N was 7336 (272 flares); for “Outcome: new medication or dosage increase due to flare” some outcome data was missing, and the total N was 5287 (122 flares). Missing values for vaccine type and disease activity were derived by multiple imputation using full conditional specification. bDMARDs: biological disease-modifying antirheumatic drugs; CI: confidence interval; Combi: combination therapy; I-RMDs: inflammatory rheumatic and musculoskeletal diseases; Mono: monotherapy; OR: odds ratio; TNFi: tumor necrosis factor inhibitors; tsDMARDs: targeted synthetic disease-modifying antirheumatic drugs.

**Supplementary Table 4.** Multivariable logistic regression analysis of factors associated with flare, using either “I-RMD flare” or “new anti-rheumatic medication or dosage increase due to flare” as the dependent variable (secondary model without data imputation)

| Covariates                                                                          | Outcome: flare   |                  | Outcome: new medication or dosage increase due to flare |                  |
|-------------------------------------------------------------------------------------|------------------|------------------|---------------------------------------------------------|------------------|
|                                                                                     | OR (95% CI)      | p-value          | OR (95% CI)                                             | p-value          |
| Age, per decade of life                                                             | 0.89 (0.82-0.97) | <b>0.009</b>     | 0.94 (0.83-1.06)                                        | 0.32             |
| Female                                                                              | 1.43 (1.06-1.93) | <b>0.02</b>      | 1.16 (0.76-1.76)                                        | 0.50             |
| <b>Diagnostic group</b>                                                             |                  |                  |                                                         |                  |
| Inflammatory joint diseases                                                         | Reference        |                  | Reference                                               |                  |
| Connective tissue diseases                                                          | 0.73 (0.45-1.19) | 0.21             | 0.77 (0.39-1.50)                                        | 0.44             |
| Vasculitis                                                                          | 1.02 (0.60-1.72) | 0.95             | 1.01 (0.51-2.03)                                        | 0.97             |
| Other inflammatory RMDs or condition                                                | 1.37 (0.57-3.28) | 0.49             | 1.18 (0.35-3.99)                                        | 0.79             |
| <b>Disease activity</b>                                                             |                  |                  |                                                         |                  |
| Remission                                                                           | Reference        |                  | Reference                                               |                  |
| Low disease activity                                                                | 1.44 (1.08-1.93) | <b>0.014</b>     | 1.49 (0.95-2.32)                                        | 0.083            |
| Moderate or high disease activity                                                   | 1.54 (1.08-2.19) | <b>0.017</b>     | 3.05 (1.88-4.96)                                        | <b>&lt;0.001</b> |
| <b>Vaccine type</b>                                                                 |                  |                  |                                                         |                  |
| Pfizer-BioNTech                                                                     | Reference        |                  | Reference                                               |                  |
| Moderna                                                                             | 0.91 (0.58-1.43) | 0.68             | 1.47 (0.82-2.65)                                        | 0.19             |
| AstraZeneca                                                                         | 1.19 (0.86-1.65) | 0.29             | 1.45 (0.92-2.30)                                        | 0.11             |
| Others                                                                              | 0.14 (0.02-0.99) | <b>0.048</b>     | 0                                                       | 1                |
| <b>Anti-rheumatic medications</b>                                                   |                  |                  |                                                         |                  |
| None                                                                                | Reference        |                  | Reference                                               |                  |
| Immunosuppressants                                                                  | 0.38 (0.09-1.64) | 0.19             | 0                                                       | <b>1</b>         |
| Methotrexate                                                                        | 0.60 (0.38-0.97) | <b>0.036</b>     | 0.44 (0.23-0.84)                                        | <b>0.013</b>     |
| Leflunomide                                                                         | 1.13 (0.50-2.52) | 0.77             | 0.62 (0.18-2.12)                                        | 0.44             |
| Sulfasalazine                                                                       | 0.93 (0.38-2.32) | 0.88             | 0.74 (0.21-2.58)                                        | 0.63             |
| Antimalarials                                                                       | 0.96 (0.52-1.77) | 0.89             | 0.55 (0.22-1.40)                                        | 0.21             |
| TNFi                                                                                | 0.59 (0.37-0.92) | <b>0.021</b>     | 0.57 (0.31-1.06)                                        | 0.074            |
| tsDMARDs                                                                            | 0.61 (0.30-1.24) | 0.17             | 0.38 (0.12-1.17)                                        | 0.092            |
| Rituximab                                                                           | 0.32 (0.13-0.79) | <b>0.013</b>     | 0.11 (0.01-0.81)                                        | <b>0.03</b>      |
| Other bDMARDs                                                                       | 0.65 (0.39-1.08) | 0.09             | 0.56 (0.27-1.13)                                        | 0.10             |
| <b>Glucocorticoids</b>                                                              | 0.63 (0.41-0.98) | <b>0.038</b>     | 0.79 (0.45-1.40)                                        | 0.42             |
| <b>Cessation/reduction of anti-rheumatic medications at the time of vaccination</b> | 4.17 (2.98-5.83) | <b>&lt;0.001</b> | 2.29 (1.34-3.91)                                        | <b>0.003</b>     |

For “Outcome: flare”, the total N was 5958 (254 flares); for “Outcome: new medication or dosage increase due to flare” some outcome data was missing, and the total N was 4900 (115 flares). bDMARDs: biological disease-modifying antirheumatic drugs; CI: confidence interval; Combi: combination therapy; I-RMDs: inflammatory rheumatic and musculoskeletal diseases; Mono: monotherapy; MTX: methotrexate; OR: odds ratio; TNFi: tumor necrosis factor inhibitors; tsDMARDs: targeted synthetic disease-modifying antirheumatic drugs.
